# Supplementary material for: Dietitians’ Attitudes and Understanding of the Promotion of Grains, Whole Grains, and Ultra-Processed Foods
Source: MDPI journal article supplement (doi:10.3390/nu14153026), 2022-07-23
Supplement: s1 [file s1]

# Supplementary Materials

**Table S1.** Application of survey questions relative to the constituents of the Theory of Planned Behaviour.

| Question                                                                                                                                                                                                                                        | Attitudes | Subjective normative beliefs | Perceived behavioural control |
|-------------------------------------------------------------------------------------------------------------------------------------------------------------------------------------------------------------------------------------------------|-----------|------------------------------|-------------------------------|
| Q10 - Do you recommend or discuss grain foods in consultation, groups sessions or via media messages?                                                                                                                                           | ✓         |                              | ✓                             |
| Q11 - Do you promote amounts of grain foods based on National Dietary Guidelines?                                                                                                                                                               | ✓         |                              | ✓                             |
| Q12 - Are grain foods prioritised in your advice for general healthy eating?                                                                                                                                                                    | ✓         |                              | ✓                             |
| Q13 - Considering your advice on general healthy eating, which particular grains do you recommend? Please select all that apply.                                                                                                                | ✓         |                              | ✓                             |
| Q14 - Considering your advice on general healthy eating, which particular grain-based foods do you recommend? Please select all that apply.                                                                                                     | ✓         |                              | ✓                             |
| Q15 - List the grain foods or types of grain you will not recommend.                                                                                                                                                                            | ✓         |                              | ✓                             |
| Q16 - Do you recommend whole grain foods?                                                                                                                                                                                                       | ✓         |                              | ✓                             |
| Q17 - Considering your advice on general healthy eating, how often do you recommend whole grain foods in dietetic practice?                                                                                                                     | ✓         |                              | ✓                             |
| Q18 - What words might you use in practice to recommend whole grain foods? Please select all that apply.                                                                                                                                        | ✓         |                              | ✓                             |
| Q19 - What sources of information do you most often use for your advice relating to whole grain food intake? Please select up to two responses.                                                                                                 | ✓         |                              | ✓                             |
| Q20 - In your opinion, what are the nutrition and health benefits of whole grain foods? Please select all that apply.                                                                                                                           | ✓         |                              | ✓                             |
| Q21 - Typically, in what situations might you prioritise whole grain foods in dietetic practice? Please select all that apply.                                                                                                                  | ✓         |                              | ✓                             |
| Q22 - Are there any reasons why you would not recommend whole grain foods to a patient/client/group?                                                                                                                                            | ✓         | ✓                            | ✓                             |
| Q23 - On a scale of 1 to 5, how confident are you in educating clients about whole grain foods (1 representing not at all confident, 5 representing very confident).                                                                            |           |                              | ✓                             |
| Q24 - In your opinion, are there any barriers to whole grain consumption?                                                                                                                                                                       | ✓         | ✓                            | ✓                             |
| Q25 - In your opinion, what are the barriers to whole grain food consumption? Please select all that apply.                                                                                                                                     | ✓         | ✓                            | ✓                             |
| Q26 - In your opinion, what strategies could help overcome the barriers to whole grain consumption?                                                                                                                                             | ✓         | ✓                            | ✓                             |
| Q27 - Here are some strategies that have been used previously to promote whole grain intake. Please rank which of the following would have the greatest effect (1 being most effective and 6 being least effective) (drag and drop to reorder): | ✓         | ✓                            | ✓                             |
| Q28 - Do you believe other dietitians regularly promote and prioritise intake of whole grain foods in practice?                                                                                                                                 |           | ✓                            |                               |
| Q29 - Please indicate the extent you agree or disagree with the following statement. 'Dietitians are well educated about the importance and benefits associated with whole grain food consumption'.                                             | ✓         | ✓                            | ✓                             |
| Q30 - How do you think whole grain education for dietitians could be improved? Please select all that apply.                                                                                                                                    | ✓         | ✓                            | ✓                             |
| Q31 - Please indicate the extent you agree or disagree with the following statement. 'The public is well educated on the importance and benefits associated with whole grain food consumption'.                                                 | ✓         | ✓                            | ✓                             |
| Q32 - Prior to reading the description above, were you familiar with the NOVA food classification system?                                                                                                                                       |           |                              | ✓                             |
| Q33 - Are you familiar with general advice to limit intake of highly processed/ultra- processed foods?                                                                                                                                          |           |                              | ✓                             |

|                                                                                                                                                                                                    |   |   |   |
|----------------------------------------------------------------------------------------------------------------------------------------------------------------------------------------------------|---|---|---|
| Q34 - Do you incorporate and/or refer to NOVA or processing of foods in dietetic practice (that is in consultations, group sessions or media)?                                                     | ✓ |   | ✓ |
| Q35 - Do you agree with NOVA's classification of foods?                                                                                                                                            | ✓ |   |   |
| Q36 - Please elaborate on why you selected the above option.                                                                                                                                       | ✓ | ✓ | ✓ |
| Q37 - When hearing the term "ultra-processed foods", what foods come to mind?                                                                                                                      | ✓ | ✓ | ✓ |
| Q38#1 - Please indicate which foods you consider to be whole grain and which foods you consider to be "ul... - I consider this a whole grain food                                                  | ✓ |   | ✓ |
| Q38#2 - Please indicate which foods you consider to be whole grain and which foods you consider to be "ul... - I consider this a "ultra-processed food"                                            | ✓ |   | ✓ |
| Q39 - Packaged breads (all breads packed in a plastic bag) are classified within NOVA as ultra-processed. Were you aware of this prior to this survey?                                             |   |   | ✓ |
| Q40 - Ready-to-eat breakfast cereals (all fortified breakfast cereals) are classified within NOVA as ultra-processed. Were you aware of this prior to this survey?                                 |   |   | ✓ |
| Q41 - Now that you are aware NOVA classifies some whole grain breads and cereals as "ultra-processed foods", please indicate to what extent you agree or disagree with the following statements... | ✓ | ✓ |   |
| Q42 - Do you have any other comments regarding the NOVA classification system?                                                                                                                     | ✓ | ✓ | ✓ |
